# Supplementary material
Source: PubMed Central journal article supplement (PMC2725268)
Supplement: mmc1.pdf [file mmc1.pdf]

## Supplemental Data

### A Heterozygous Truncating Mutation in *RRM2B*

### Causes Autosomal-Dominant Progressive External

### Ophthalmoplegia with Multiple mtDNA Deletions

Henna Tyynismaa, Emil Ylikallio, Mehul Patel, Maria J. Molnar, Ronald G. Haller,  
and Anu Suomalainen

**Table S1. Primer Sequences Used for Sequencing of the *RRM2B* Gene**

| <b>Primer Name</b>                  | <b>Primer Sequence 5' → 3'</b> |
|-------------------------------------|--------------------------------|
| <i>RRM2B</i> exon 1 forward         | CTTGCCGAGACAGGGATAAT           |
| <i>RRM2B</i> exon 1 reverse         | GCGGCGAATAACATTTTCCTA          |
| <i>RRM2B</i> exon 2 forward         | ACAGGCTCTCAAACCAATGC           |
| <i>RRM2B</i> exon 2 reverse         | TCTCAGTAATTCCAACACTTATCTTC     |
| <i>RRM2B</i> exon 3 forward         | TGCAGTGCTAACATCTTTCTTTTT       |
| <i>RRM2B</i> exon 3 reverse         | AGACATCTTGTCTTTGGCTGAA         |
| <i>RRM2B</i> exon 4 forward         | GCGATAATGCTGATGTCCAG           |
| <i>RRM2B</i> exon 4 reverse         | TGCTCAGAAACTTCCATACTTGA        |
| <i>RRM2B</i> exon 5 forward         | GGCACCTGTCGTCCTAGC             |
| <i>RRM2B</i> exon 5 reverse         | TCCATGCTGTAACTTTGATTCG         |
| <i>RRM2B</i> exon 6 forward         | AGGCATACCTTTCTGCTCCA           |
| <i>RRM2B</i> exon 6 reverse         | GAGATGGGAGGAATGCTTGA           |
| <i>RRM2B</i> exon 7 forward         | AATGCTTGACCCATCACCAT           |
| <i>RRM2B</i> exon 7 reverse         | CAGGCTGACCAGAATAAAATTG         |
| <i>RRM2B</i> exon 8 forward         | TTTCCTTGGACAAAATCAGTCTT        |
| <i>RRM2B</i> exon 8 reverse         | TGCAAAACCTTGTTTCATACAAAA       |
| <i>RRM2B</i> exon 9 forward         | CCTGACCTCTGTTTTGGTCA           |
| <i>RRM2B</i> exon 9 reverse         | AGCAAACCCCCAGTCCTTTA           |
| <i>RRM2B</i> cDNA (partial) forward | GGCCTCATTGGAATGAATTG           |
| <i>RRM2B</i> cDNA (partial) reverse | GCATCCAAGGTGAAGACGTT           |

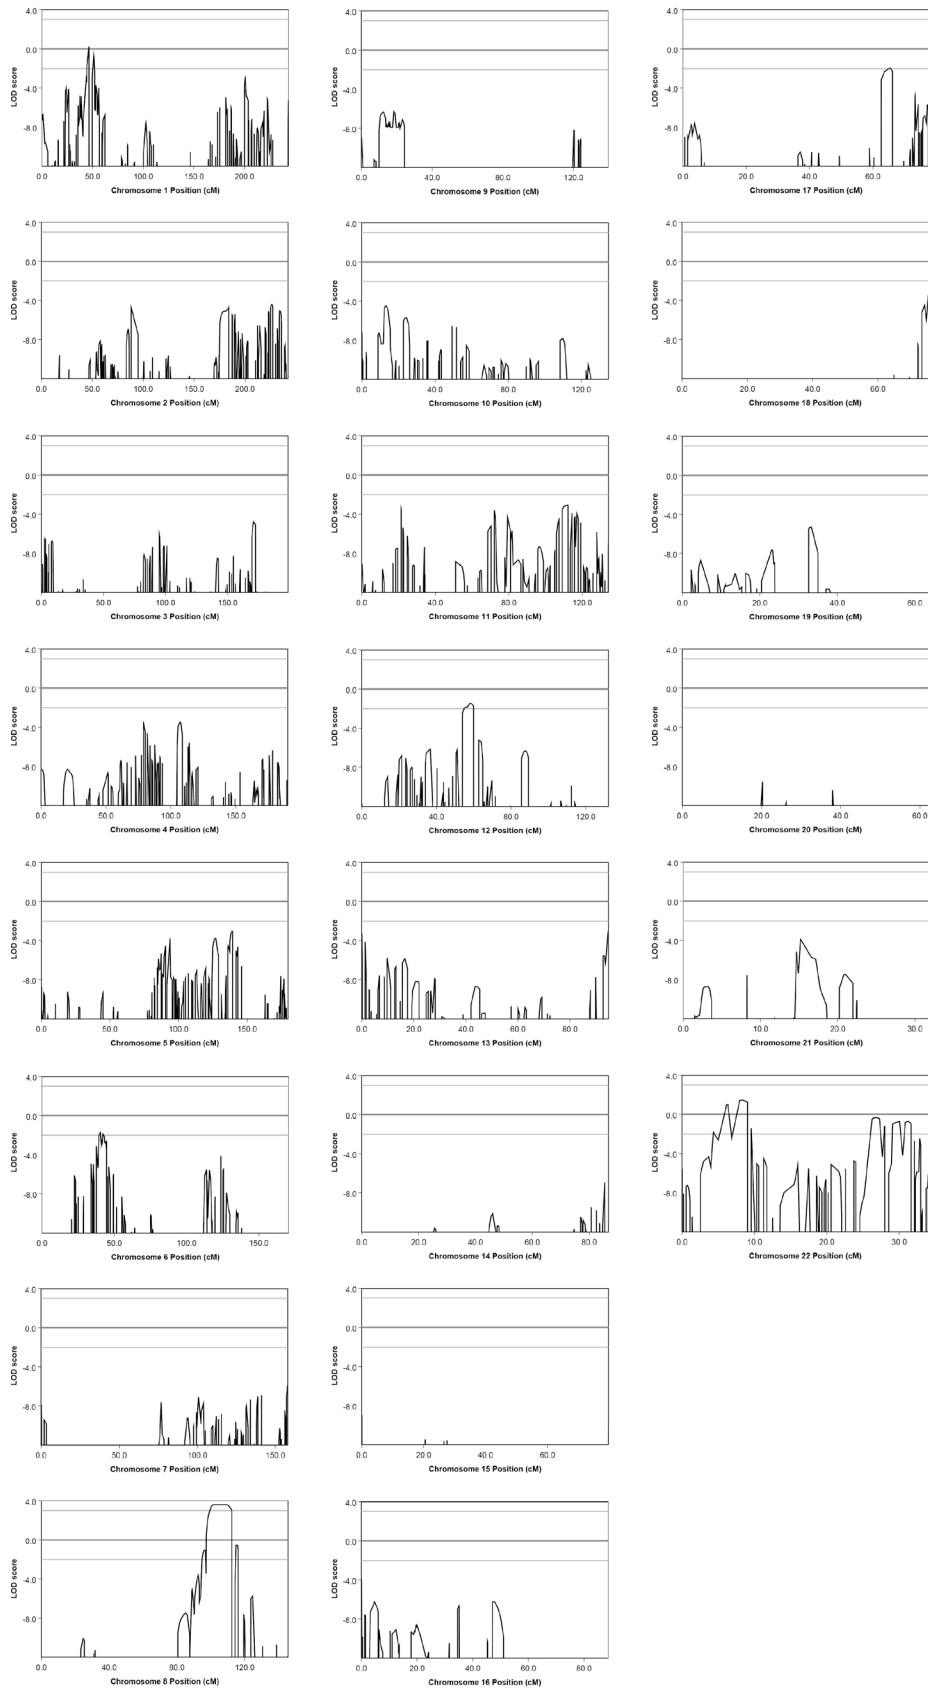

**Figure S1. Multipoint LOD Score Analysis Showing Region of Significant Linkage on Chromosome 8**
